# Supplementary material for: Mortality, recovery, and community shifts of scleractinian corals in Puerto Rico one decade after the 2005 regional bleaching event
Source: PeerJ. 2017 Jul 25;5:e3611. doi: 10.7717/peerj.3611 (PMC5531000; doi:10.7717/peerj.3611)
Supplement: Supplemental Information 3 — The cover of the different coral species between the reef sites in Puerto Rico. Coral species listed contributed to at least 10% of the total cover. [file peerj-05-3611-s003.xlsx]

## Sheet: Sheet1
Site	Agaricia	Colpophyllia natans	Madracis mirabilis	Meandrina meandrites	Orbicella annularis	Montastrea cavernosa	Porites astreoides	Porites porites	Siderastrea siderea		Site	Location	Year	Depth
Caja de Muerto	0.5	0	0	0	7.54	0	1.29	0.79	0		Caja de Muerto	Ponce	2005	10
Caja de Muerto	0.93	0	0	0	28.23	3.24	0.34	0	0.59		Caja de Muerto	Ponce	2005	10
Caja de Muerto	1.17	0	0	0	11.06	1.07	2.08	0.48	0		Caja de Muerto	Ponce	2005	10
Caja de Muerto	1.12	7.44	0	0.16	3.65	4.89	0.96	0	0.47		Caja de Muerto	Ponce	2005	10
Caja de Muerto	4.21	0.24	0	0	4.44	0.57	1.67	0	0		Caja de Muerto	Ponce	2005	10
Caja de Muerto	0	0	0	0	1.65	0	2.81	0	0		Caja de Muerto	Ponce	2006	10
Caja de Muerto	0	0	0	0	8.93	3.08	0	0	1.09		Caja de Muerto	Ponce	2006	10
Caja de Muerto	0.33	0	0	0	6.14	1.04	2.38	0	2.61		Caja de Muerto	Ponce	2006	10
Caja de Muerto	0	1.05	0	0.89	2.98	3.89	1.37	0	0.4		Caja de Muerto	Ponce	2006	10
Caja de Muerto	0	0.25	0	0	3.37	3.02	2.79	0.08	0		Caja de Muerto	Ponce	2006	10
Caja de Muerto	0	0	0	0	1.58	0	1.88	0	0		Caja de Muerto	Ponce	2007	10
Caja de Muerto	0	0	0	0	7.14	4.29	0.44	0	0.79		Caja de Muerto	Ponce	2007	10
Caja de Muerto	0.46	0	0	0	6.7	0	3.38	0	1.47		Caja de Muerto	Ponce	2007	10
Caja de Muerto	0	0	0	1.16	3.25	4.69	1.49	0.23	1.86		Caja de Muerto	Ponce	2007	10
Caja de Muerto	0.59	0	0	0	2.67	1.19	2.2	0	0		Caja de Muerto	Ponce	2007	10
Caja de Muerto	0.39	0	0	0	4.12	0	1.68	0.2	1.77		Caja de Muerto	Ponce	2008	10
Caja de Muerto	0	0	0	0	8.6	3.44	0.92	0	0.86		Caja de Muerto	Ponce	2008	10
Caja de Muerto	0	0	0	0	4.45	0.71	2.54	0	0.48		Caja de Muerto	Ponce	2008	10
Caja de Muerto	0	0	0	0.91	2.06	3.01	1.24	0	1.99		Caja de Muerto	Ponce	2008	10
Caja de Muerto	0.69	0	0	0	1.52	0.6	1.4	0	0		Caja de Muerto	Ponce	2008	10
Caja de Muerto	0	0	0	0	4.07	0	4.34	0.49	0.78		Caja de Muerto	Ponce	2009	10
Caja de Muerto	0	0	0	0	16.06	3.64	0.78	0	0.92		Caja de Muerto	Ponce	2009	10
Caja de Muerto	0.35	0	0	0.52	8.83	1.23	1.9	0	2.08		Caja de Muerto	Ponce	2009	10
Caja de Muerto	0	6.3	0	0.79	1.74	2.73	1.31	0	1.84		Caja de Muerto	Ponce	2009	10
Caja de Muerto	0.42	0	0	0	3.5	3.02	4.86	0	0		Caja de Muerto	Ponce	2009	10
Caja de Muerto	1.24	0	0	0	3.38	0	0.87	0.78	1.24		Caja de Muerto	Ponce	2010	10
Caja de Muerto	0	0	0	0	9.52	3.42	1.15	0	0.99		Caja de Muerto	Ponce	2010	10
Caja de Muerto	0.33	0	0	0.58	7.3	0.82	2.47	0	0.41		Caja de Muerto	Ponce	2010	10
Caja de Muerto	1.38	0	0	1.29	1.71	5.3	1.28	0	1.95		Caja de Muerto	Ponce	2010	10
Caja de Muerto	0.26	0.53	0	0	2.88	3.26	2.76	0	0.26		Caja de Muerto	Ponce	2010	10
Caja de Muerto	0	0	0	0	0.92	0	0	0	0.92		Caja de Muerto	Ponce	2011	10
Caja de Muerto	0	0	0	0	8.42	3.41	1.34	0	1.17		Caja de Muerto	Ponce	2011	10
Caja de Muerto	0	0	0	0	5	0.9	2.05	0	2.71		Caja de Muerto	Ponce	2011	10
Caja de Muerto	0.37	0	0	1.3	2.57	3.43	0.74	0	2.23		Caja de Muerto	Ponce	2011	10
Caja de Muerto	0.34	0	0	0	1.47	3.12	4.58	0	0.43		Caja de Muerto	Ponce	2011	10
Caja de Muerto	0	0	0	0	1.40998	0	1.19306	0	0		Caja de Muerto	Ponce	2012	10
Caja de Muerto	0.343643	0	0	0	9.96564	2.57732	0	0	1.37457		Caja de Muerto	Ponce	2012	10
Caja de Muerto	0	0	0	0	2.96785	0.329761	2.22589	0	3.38005		Caja de Muerto	Ponce	2012	10
Caja de Muerto	1.53015	0	0	1.35014	0.450045	3.78038	0.720072	0	0.630063		Caja de Muerto	Ponce	2012	10
Caja de Muerto	0.674536	0	0	0	3.62563	3.11973	4.55312	0	0		Caja de Muerto	Ponce	2012	10
Caja de Muerto	0.4			2.01005	4.1206		0.502513		0.603015		Caja de Muerto	Ponce	2015	10
Caja de Muerto					17.1745	2.40074	0.461681		2.21607		Caja de Muerto	Ponce	2015	10
Caja de Muerto	0.43				6.23932	0.42735	1.62393		0.854701		Caja de Muerto	Ponce	2015	10
Caja de Muerto	3.13			1.70251	1.07527	5.10753	0.537634	0.36	0.537634		Caja de Muerto	Ponce	2015	10
Caja de Muerto	3.63				6.89655	2.29885	4.15561		0.618921		Caja de Muerto	Ponce	2015	10
Cayo Coral	1.13	3.43	0	0	4.78	0.61	3.65	0	0.98		Cayo Coral	Guanica	2005	10
Cayo Coral	0	1.17	0	0	6.45	4.05	2.06	0	1.16		Cayo Coral	Guanica	2005	10
Cayo Coral	0.56	3.04	0	0.56	3.16	2.48	0	0	0		Cayo Coral	Guanica	2005	10
Cayo Coral	1.28	4.62	0	0	3.18	1.07	0	0	0		Cayo Coral	Guanica	2005	10
Cayo Coral	0.34	0	0	0	14.95	0	0	0	0		Cayo Coral	Guanica	2005	10
Cayo Coral	0	4.54	0	0.32	2.59	0	4.46	0	0		Cayo Coral	Guanica	2006	10
Cayo Coral	0	0	0	0	2.35	4.52	0	0	3.98		Cayo Coral	Guanica	2006	10
Cayo Coral	0	5.18	0	2.1	0	0	1.58	0	0		Cayo Coral	Guanica	2006	10
Cayo Coral	4.55	0	0	0	4.3	0	0	0	0		Cayo Coral	Guanica	2006	10
Cayo Coral	0.89	0	0	0	5.26	2.66	0	0	0		Cayo Coral	Guanica	2006	10
Cayo Coral	0	0	0	0	2.95	1.59	0.8	0	0		Cayo Coral	Guanica	2007	10
Cayo Coral	0	0	0	0	2.41	2.34	2.34	0	3.99		Cayo Coral	Guanica	2007	10
Cayo Coral	0	2.53	0	2.35	4.21	1.93	0.88	0	0		Cayo Coral	Guanica	2007	10
Cayo Coral	0	0	0	0	1.4	0.4	0	0	0		Cayo Coral	Guanica	2007	10
Cayo Coral	0	0	0	0	8.33	0.43	2.34	0	0		Cayo Coral	Guanica	2007	10
Cayo Coral	0	0	0	0	0.76	2.61	1.54	0.33	0		Cayo Coral	Guanica	2008	10
Cayo Coral	0	0	0	0.68	3.71	0.19	1.01	0	1.33		Cayo Coral	Guanica	2008	10
Cayo Coral	0.39	1.57	0	2.58	2.72	0.59	2.23	0.59	0		Cayo Coral	Guanica	2008	10
Cayo Coral	0	0	0	0	0.96	0.75	0	0	0.64		Cayo Coral	Guanica	2008	10
Cayo Coral	0.44	0	0	0	8.24	0.53	1.5	0.26	0		Cayo Coral	Guanica	2008	10
Cayo Coral	0	0	0	0	3.09	3.01	2.77	0	0		Cayo Coral	Guanica	2009	10
Cayo Coral	0.39	0	0	0	2.73	1.08	1.38	0.79	4.62		Cayo Coral	Guanica	2009	10
Cayo Coral	0	5.07	0	2.22	2.71	0.69	2.57	0.9	0		Cayo Coral	Guanica	2009	10
Cayo Coral	0	0	0	0	1.89	1.01	0	0	0.88		Cayo Coral	Guanica	2009	10
Cayo Coral	0.82	0	0	0	7.36	0	1.76	0	0		Cayo Coral	Guanica	2009	10
Cayo Coral	0	0	0	0	10.46	0.52	1.66	0	0.17		Cayo Coral	Guanica	2010	10
Cayo Coral	0	0	0	0	2.82	1.4	1.22	0.94	0.85		Cayo Coral	Guanica	2010	10
Cayo Coral	0	6.44	0	1.83	2.82	0.92	2.53	1.81	0.61		Cayo Coral	Guanica	2010	10
Cayo Coral	0.39	0	0	0	6.41	1.18	1.37	1.18	1.67		Cayo Coral	Guanica	2010	10
Cayo Coral	0	0	0	1.14	5.11	1.14	1.46	0	1.26		Cayo Coral	Guanica	2010	10
Cayo Coral	0	0	0	0	3.35	3.43	1.04	0.58	0		Cayo Coral	Guanica	2011	10
Cayo Coral	0.19	0	0	0	5.39	1.42	2.49	1.04	3.78		Cayo Coral	Guanica	2011	10
Cayo Coral	0	8.63	0	1.97	2.88	0.62	2.58	0	0.62		Cayo Coral	Guanica	2011	10
Cayo Coral	0	0.6	0	0	1.69	0.89	1.98	0	0		Cayo Coral	Guanica	2011	10
Cayo Coral	0.58	0	0	0	6.06	0.86	3	0	0		Cayo Coral	Guanica	2011	10
Cayo Coral	0	0	0	0	3.5	1.3	1	0	1.5		Cayo Coral	Guanica	2012	10
Cayo Coral	0	0	0	0	1.7	3.2	2.3	0	4.6		Cayo Coral	Guanica	2012	10
Cayo Coral	0	5.6	0	4.3	3.4	1.6	0.6	2.7	0		Cayo Coral	Guanica	2012	10
Cayo Coral	0	0	0	0	3	1	0	0	0		Cayo Coral	Guanica	2012	10
Cayo Coral	0	0	0	0	0	0	1.6683	0	0.294406		Cayo Coral	Guanica	2012	10
Cayo Coral	2.0765				2.84153	0.874317	1.31148	0.218579	0.983607		Cayo Coral	Guanica	2015	10
Cayo Coral	0.327154				8.39695		1.85387	0.654308	3.81679		Cayo Coral	Guanica	2015	10
Cayo Coral	0.409836	8.71		0.31	2.56148	0.614754	2.56148	3.38115	0.717213		Cayo Coral	Guanica	2015	10
Cayo Coral					3.0581						Cayo Coral	Guanica	2015	10
Cayo Coral	2.82132				10.5538	0.522466	3.23929	0.31348	0.208986		Cayo Coral	Guanica	2015	10
Cayo Coral	1.40541				3.78378		2.05405		1.62162		Cayo Coral	Guanica	2017	10
Cayo Coral	0.991189				5.61674	1.32159		0.881057	3.63436		Cayo Coral	Guanica	2017	10
Cayo Coral	0.859291	8.59291		1.39635	4.94092	1.07411	1.50376	2.57787	1.50376		Cayo Coral	Guanica	2017	10
Cayo Coral					1.61117				0.214823		Cayo Coral	Guanica	2017	10
Cayo Coral	2.39006				11.4723	1.14723	3.34608	1.14723			Cayo Coral	Guanica	2017	10
Derrumbadero	4.14	0	0	1.99	18.13	0	2.73	0	0.52		Derrumbadero	Ponce	2001	20
Derrumbadero	4.88	0	0	0	16.22	1.97	5.43	0	0		Derrumbadero	Ponce	2001	20
Derrumbadero	2.95	0	0	0.53	21.93	2.58	4.1	0	0		Derrumbadero	Ponce	2001	20
Derrumbadero	1.28	4.14	0	0	33.76	7.84	0	0	0		Derrumbadero	Ponce	2001	20
Derrumbadero	2.41	0	0	0.77	31.52	5.28	2.48	0.33	0		Derrumbadero	Ponce	2001	20
Derrumbadero	5.9	0	0	0	19.58	0	2.18	0	0.41		Derrumbadero	Ponce	2005	20
Derrumbadero	4.08	0	0	0	14.38	0.86	5.5	0	0		Derrumbadero	Ponce	2005	20
Derrumbadero	2.57	0	0	0	16.1	1.46	5.75	0	0		Derrumbadero	Ponce	2005	20
Derrumbadero	3.82	0.43	0	0	29.04	8.24	0.62	0	0		Derrumbadero	Ponce	2005	20
Derrumbadero	2.81	0	0	0.91	22.94	3.97	2.25	1.52	0		Derrumbadero	Ponce	2005	20
Derrumbadero	1.14	0	0	0	10.23	0	1.34	0.52	0.41		Derrumbadero	Ponce	2006	20
Derrumbadero	0.6	0	0	0	3.07	0.6	1.69	0	0		Derrumbadero	Ponce	2006	20
Derrumbadero	0.53	0	0	0	7.59	2.89	3.42	0	0		Derrumbadero	Ponce	2006	20
Derrumbadero	1.5	0	0	0	8.88	0	0.5	0	0		Derrumbadero	Ponce	2006	20
Derrumbadero	0	0	0	0	13.72	2.42	2.63	0	0		Derrumbadero	Ponce	2006	20
Derrumbadero	0	0	0	0.64	7.29	0	2.11	0.83	0		Derrumbadero	Ponce	2007	20
Derrumbadero	0	0	0	0	3.31	0.55	1.89	0	0		Derrumbadero	Ponce	2007	20
Derrumbadero	0.98	0	0	0	4.95	5.27	4.2	0	0		Derrumbadero	Ponce	2007	20
Derrumbadero	0.62	2.28	0	0.73	7.28	3.97	1.25	0	0		Derrumbadero	Ponce	2007	20
Derrumbadero	1.06	0	0	1.26	7.01	4.73	3.1	0	0		Derrumbadero	Ponce	2007	20
Derrumbadero	1.12	0	0	0	8.97	0	1.87	2.84	0		Derrumbadero	Ponce	2008	20
Derrumbadero	0.68	0	0	0	2.59	1.7	1.94	0	0		Derrumbadero	Ponce	2008	20
Derrumbadero	1.23	0	0	0	3.5	3.21	3.21	0	0		Derrumbadero	Ponce	2008	20
Derrumbadero	1.05	2.65	0	0	3.08	2.12	1.13	0	0		Derrumbadero	Ponce	2008	20
Derrumbadero	0.89	0	0	0	1.09	2.93	4.12	0	0.22		Derrumbadero	Ponce	2008	20
Derrumbadero	0.59	0	0	0	9.43	0	3.63	2.1	0		Derrumbadero	Ponce	2009	20
Derrumbadero	0	0	0	0	4.21	0.81	2.05	0	0		Derrumbadero	Ponce	2009	20
Derrumbadero	0.76	0	0	0	4.23	5	2.46	0	0		Derrumbadero	Ponce	2009	20
Derrumbadero	1.86	1.86	0	0	4.81	4.19	1.32	0	0		Derrumbadero	Ponce	2009	20
Derrumbadero	2	0	0	1.36	8.23	1.56	3.04	0	0		Derrumbadero	Ponce	2009	20
Derrumbadero	0.53	0	0	0	11.72	0	2.25	0.83	0		Derrumbadero	Ponce	2010	20
Derrumbadero	1.01	0	0	0	2.95	0	3.82	0	0		Derrumbadero	Ponce	2010	20
Derrumbadero	2.32	0	0	0	5.65	3.77	1.18	0	0		Derrumbadero	Ponce	2010	20
Derrumbadero	1.38	0	0	0	7.08	6.31	0	0	0		Derrumbadero	Ponce	2010	20
Derrumbadero	1.11	0	0	0	14.09	3.9	2.15	0	0		Derrumbadero	Ponce	2010	20
Derrumbadero	0.93	0	0	0	8.91	0	2.36	0	0		Derrumbadero	Ponce	2011	20
Derrumbadero	0.62	0	0	0	1.03	0	2.5	0	0		Derrumbadero	Ponce	2011	20
Derrumbadero	1.41	0	0	0	7.38	2.67	2.75	0	0		Derrumbadero	Ponce	2011	20
Derrumbadero	3.95	2.18	0	0.55	5.66	4.19	2.71	0	0		Derrumbadero	Ponce	2011	20
Derrumbadero	1.48	0	0	0.94	9.6	3.1	2.29	0	0		Derrumbadero	Ponce	2011	20
Derrumbadero	0	0	0	0	8.60441	0	3.35782	0	1.15425		Derrumbadero	Ponce	2012	20
Derrumbadero	0.817439	0	0	0	3.67847	0	1.08992	0	0		Derrumbadero	Ponce	2012	20
Derrumbadero	2.00348	0	0	0	4.87805	2.43902	3.13589	0	0		Derrumbadero	Ponce	2012	20
Derrumbadero	0.615385	0	0	0	5.02564	1.94872	1.94872	0	0		Derrumbadero	Ponce	2012	20
Derrumbadero	2.15403	0	0	1.24858	4.88082	2.04313	1.92963	0	0.340522		Derrumbadero	Ponce	2012	20
Derrumbadero	3.13853			0.757576	14.8268	1.7316	5.95238		0.324675		Derrumbadero	Ponce	2015	20
Derrumbadero	6.38064	2.09021		0.330033	6.49065	2.31023	3.74037				Derrumbadero	Ponce	2015	20
Derrumbadero	4.90196				7.7342	4.57516	3.92157				Derrumbadero	Ponce	2015	20
Derrumbadero	1.58537				4.5122	0.487805	3.29268				Derrumbadero	Ponce	2015	20
Derrumbadero	0.995575				10.6195		2.98673				Derrumbadero	Ponce	2015	20
Derrumbadero	2.14823			1.28894	20.3008	0.966702	5.37057				Derrumbadero	Ponce	2017	20
Derrumbadero	0.807382	3.80623			12.1107	2.53749	3.57555				Derrumbadero	Ponce	2017	20
Derrumbadero	2.72512				8.29384	1.65877	4.50237		0.236967		Derrumbadero	Ponce	2017	20
Derrumbadero	2.02931				4.62232		2.02931		0.225479		Derrumbadero	Ponce	2017	20
Derrumbadero	1.46905			2.51836	13.7461		4.19727	0.839454			Derrumbadero	Ponce	2017	20
Des15	0.8	0	0	0	8.55	2.7	2.05	0	0		Desecheo	Desecheo	2004	15
Des15	0.61	0	0	0	6.52	0.8	3.33	0	0		Desecheo	Desecheo	2004	15
Des15	0.28	0	0	0	18.59	3.6	2.07	0	0		Desecheo	Desecheo	2004	15
Des15	0.39	0	0	0	5.8	1.89	1.4	0	0		Desecheo	Desecheo	2004	15
Des15	4.58	0	0	1.02	19.99	2.18	1.96	0	0		Desecheo	Desecheo	2004	15
Des15	0.42	0	0	0	7.17	3.06	2.39	0	0.63		Desecheo	Desecheo	2005	15
Des15	1.33	0	0	0	9.06	0	6.56	0	0		Desecheo	Desecheo	2005	15
Des15	0	0	0	0	14	1.63	1.9	0	0		Desecheo	Desecheo	2005	15
Des15	0	0	0	0	4.77	2.17	1.26	0	0		Desecheo	Desecheo	2005	15
Des15	6.23	0	0	0.99	22.5	2.46	1.62	0	0		Desecheo	Desecheo	2005	15
Des15	0	0	0	0	1.56	3.05	2.08	0	1.15		Desecheo	Desecheo	2006	15
Des15	0	0.84	0	0	1.27	0	4.94	0	0		Desecheo	Desecheo	2006	15
Des15	0	0	0	0	3.99	1.99	2.29	0	0		Desecheo	Desecheo	2006	15
Des15	0.31	0	0	0	0	1.55	0.93	0	0		Desecheo	Desecheo	2006	15
Des15	6.36	0	0	0.97	5.95	2.35	0.49	0	0		Desecheo	Desecheo	2006	15
Des15	0	0	0	0	0.99	2.05	2.36	0	1.61		Desecheo	Desecheo	2007	15
Des15	0	0	0	0	1.46	0	3.51	0	0		Desecheo	Desecheo	2007	15
Des15	0	0	0	0	1.08	2.69	1.15	0	0		Desecheo	Desecheo	2007	15
Des15	0.79	0	0	0	0	1.91	1.22	0	0		Desecheo	Desecheo	2007	15
Des15	3.2	0	0	0.44	6.47	2.89	1.4	0	0		Desecheo	Desecheo	2007	15
Des15	0.56	0	0	0	0.67	2.44	3.47	0	0		Desecheo	Desecheo	2008	15
Des15	0.43	2.71	0	0	0.97	0	5.53	0	0		Desecheo	Desecheo	2008	15
Des15	0	0	0	0	1.27	2.19	1.7	0	0		Desecheo	Desecheo	2008	15
Des15	1.27	0	0	0	0.74	1.58	0.74	0.63	0		Desecheo	Desecheo	2008	15
Des15	0.75	0	0	0	4.35	1.06	2.32	0	0		Desecheo	Desecheo	2008	15
Des15	0	0	0	0	0.53	0.95	4.19	0.53	1.9		Desecheo	Desecheo	2009	15
Des15	0.82	5.02	0	0	3.69	0	3.93	0	0		Desecheo	Desecheo	2009	15
Des15	0	0	0	0.7	0	1.92	2.77	0	1.6		Desecheo	Desecheo	2009	15
Des15	0	0	0	0	1.27	0.95	3.84	0	0		Desecheo	Desecheo	2009	15
Des15	2.96	0	0	0	2.05	1.89	1.07	0	0		Desecheo	Desecheo	2009	15
Des15	0	0	0	0	0.8	1.96	3.18	0	2.53		Desecheo	Desecheo	2010	15
Des15	0.52	3.14	0	0	0	0	6.38	0	0		Desecheo	Desecheo	2010	15
Des15	0	0	0	0	2.46	2.17	1.75	0	0		Desecheo	Desecheo	2010	15
Des15	0.96	0	0	0	1.85	1.7	0	0.73	0		Desecheo	Desecheo	2010	15
Des15	1.9	0	0	0	5.98	0	0.3	0	0		Desecheo	Desecheo	2010	15
Des15	0	0	0	0	0	2.06	2.51	0	1.97		Desecheo	Desecheo	2011	15
Des15	0.82	0	0	0	0	1.02	7.34	0.41	0		Desecheo	Desecheo	2011	15
Des15	0	0	0	0	1.49	1.81	3.71	0	1.6		Desecheo	Desecheo	2011	15
Des15	1.7	0	0	0	2.05	1.37	1.25	0	0		Desecheo	Desecheo	2011	15
Des15	1.5	0	0	0	4.13	2.63	0	0	0		Desecheo	Desecheo	2011	15
Des15	0.191755	0	0	0	0.767182	0.383592	3.68729	0	4.1		Desecheo	Desecheo	2012	15
Des15	0.964632	0	0	0	0	0	7.69867	0	0.3		Desecheo	Desecheo	2012	15
Des15	0	0	0	0	7.99391	0	6.85193	0	0		Desecheo	Desecheo	2012	15
Des15	1.42857	0	0	0	2.38952	1.94762	4.44762	0.238952	0		Desecheo	Desecheo	2012	15
Des15	0.225734	0	0	0	6.77293	3.38645	1.15814	0	0		Desecheo	Desecheo	2012	15
Des15	1.71821			0.91638		2.97824	6.52921		3.89462		Desecheo	Desecheo	2015	15
Des15	1.22358	4.22692					6.56285		0.556174		Desecheo	Desecheo	2015	15
Des15	1.31723				2.85401	1.64654	1.20746				Desecheo	Desecheo	2015	15
Des15	0.699301				4.4289	1.98135	3.61305				Desecheo	Desecheo	2015	15
Des15					10.0437	2.72926	2.62009		0.982533		Desecheo	Desecheo	2015	15
Des20	1.04	7.07	0	1.25	35.82	0	0	0	0		Desecheo	Desecheo	2004	20
Des20	3.6	16.55	0	1.49	16.33	0.4	2.76	0	0		Desecheo	Desecheo	2004	20
Des20	2.74	0	0	0.61	36.27	2.44	0.51	0	0		Desecheo	Desecheo	2004	20
Des20	2.81	3.61	0	1.75	5.22	0.7	2.32	30.22	0		Desecheo	Desecheo	2004	20
Des20	13.43	0	0	0	23.98	2.43	3.77	0.9	0		Desecheo	Desecheo	2004	20
Des20	1.47	8.24	0	0	33.98	0	0.79	0	0		Desecheo	Desecheo	2005	20
Des20	0.38	19.89	0	1.69	20.84	0	0.48	0	0		Desecheo	Desecheo	2005	20
Des20	1.7	0	0	1.04	42.84	0.52	0	0	0		Desecheo	Desecheo	2005	20
Des20	2.98	3.53	0	2.02	4.21	0	3.32	31.47	0		Desecheo	Desecheo	2005	20
Des20	13.6	0	0	1.32	23.87	2.14	3.64	1.06	0		Desecheo	Desecheo	2005	20
Des20	2.63	0	0	1.09	5.03	8.83	0	0	0		Desecheo	Desecheo	2006	20
Des20	2.45	0.55	0	0	2.97	0	1.1	1.29	0		Desecheo	Desecheo	2006	20
Des20	4.27	0	0	1.18	8.48	2.47	0.69	0	0		Desecheo	Desecheo	2006	20
Des20	2.68	2.77	0	0.78	3.47	0	0	29.63	0		Desecheo	Desecheo	2006	20
Des20	8.67	0	0	1.18	3.54	5.76	0	1.17	0		Desecheo	Desecheo	2006	20
Des20	0.69	0	0	0	6.98	0.39	0.89	0	0		Desecheo	Desecheo	2007	20
Des20	1.06	4.73	0	0.53	5.48	0	4.35	0	0		Desecheo	Desecheo	2007	20
Des20	1.39	0	0	2.7	4.22	2.24	0.78	0	0		Desecheo	Desecheo	2007	20
Des20	1.36	2.6	0	0	2.01	0	1.13	27.49	0		Desecheo	Desecheo	2007	20
Des20	6.65	0	0	0	1.94	5.19	0	0	0		Desecheo	Desecheo	2007	20
Des20	3.46	0	0	0	3.68	0	0	0	0		Desecheo	Desecheo	2008	20
Des20	2.17	0	0	0.96	0.86	0	3.32	0	0		Desecheo	Desecheo	2008	20
Des20	1.04	0	0	2.75	1.26	1.47	0	0	0		Desecheo	Desecheo	2008	20
Des20	0.93	1.75	0	0	2.49	0	1.28	27.45	0		Desecheo	Desecheo	2008	20
Des20	12.8	0	0	0.99	7.03	5.63	0.4	1.78	0		Desecheo	Desecheo	2008	20
Des20	2.9	0	0	0	2.44	0	0	0	0		Desecheo	Desecheo	2009	20
Des20	1.09	1.53	0	2.03	1.31	0	3.92	0	0		Desecheo	Desecheo	2009	20
Des20	2.6	0	0	1.15	0.63	1.57	0.73	0	0		Desecheo	Desecheo	2009	20
Des20	0.7	0	0	0	0.47	0	1.51	31.02	0		Desecheo	Desecheo	2009	20
Des20	2.51	0	0	0	0.96	3.32	0	1.03	0		Desecheo	Desecheo	2009	20
Des20	1.95	0	0	0	0	0	0.9	0	0		Desecheo	Desecheo	2010	20
Des20	1.22	0	0	0	3.67	0	1.08	0	0		Desecheo	Desecheo	2010	20
Des20	1.98	0	0	0.39	0.7	0.89	0.89	0	0		Desecheo	Desecheo	2010	20
Des20	1.52	0	0	0	2.85	0	1.39	25.85	0		Desecheo	Desecheo	2010	20
Des20	3.46	0	0	0	3.52	4.41	0	1.95	0		Desecheo	Desecheo	2010	20
Des20	2.42	0	0	0	2.67	0	0	0	0		Desecheo	Desecheo	2011	20
Des20	0	0	0	0	0.88	0	1.56	0	0		Desecheo	Desecheo	2011	20
Des20	2.67	0	0	1.48	1.19	0.89	0	3.16	0		Desecheo	Desecheo	2011	20
Des20	2.32	0	0	1.17	2.9	0	4.32	14.36	0		Desecheo	Desecheo	2011	20
Des20	3.26	0	0	0.86	1.91	3.12	0	0.76	0		Desecheo	Desecheo	2011	20
Des20	2.71843	0	0	0	1.87229	0	1.76827	0	0		Desecheo	Desecheo	2012	20
Des20	0	0	0	0	2.76954	0	4.25321	0	0		Desecheo	Desecheo	2012	20
Des20	1.28734	0	0	2.29258	1.74672	0	1.31437	0	0		Desecheo	Desecheo	2012	20
Des20	1.00897	0	0	2.13448	1.89687	0	0.89687	15.7	0		Desecheo	Desecheo	2012	20
Des20	1.5625	0	0	0	0	2.1875	0.9375	0.9	0		Desecheo	Desecheo	2012	20
Des20	3.61305				5.94406		2.0979				Desecheo	Desecheo	2015	20
Des20					3.75648		3.10881				Desecheo	Desecheo	2015	20
Des20				1.78771	3.91061		1.78771				Desecheo	Desecheo	2015	20
Des20	0.839161				3.21678		1.67832	38.042	0.41958		Desecheo	Desecheo	2015	20
Des20	0.447427			0.671141	1.78971	1.90157	0.447427	3.46756			Desecheo	Desecheo	2015	20
Des30	2.96	13.19	0	0	26.18	0	0	0.61	0		Desecheo	Desecheo	2004	30
Des30	5.57	3.44	0	0	19.74	0	3.24	0	0		Desecheo	Desecheo	2004	30
Des30	3.15	0	0	0	52.53	0	0.41	0	0		Desecheo	Desecheo	2004	30
Des30	3.87	6.01	0	1.02	22.2	0	3.46	0	0		Desecheo	Desecheo	2004	30
Des30	4.29	0	0	0	35.96	0	1.84	0	0		Desecheo	Desecheo	2004	30
Des30	2.42	0	0	0	60.15	0	1.26	0	1.05		Desecheo	Desecheo	2004	30
Des30	2.71	16.72	0	0	26.16	0	0.33	0	0		Desecheo	Desecheo	2005	30
Des30	3.68	4.66	0	0.53	27.8	0	1.35	0	0		Desecheo	Desecheo	2005	30
Des30	9.07	0	0	0	46.62	0	0.57	0	0		Desecheo	Desecheo	2005	30
Des30	5.83	5.75	0	1.53	23.31	0	5.03	0	0		Desecheo	Desecheo	2005	30
Des30	2.73	0	0	0	39.94	0	2.58	0	0		Desecheo	Desecheo	2005	30
Des30	7.4	15.11	0	2.06	19.64	0	0.62	2.06	0		Desecheo	Desecheo	2006	30
Des30	2.46	3.94	0	0	16.73	0	3.54	0	0		Desecheo	Desecheo	2006	30
Des30	3.08	0	0	0	16.36	0	0.77	0	0		Desecheo	Desecheo	2006	30
Des30	5.02	0.84	0	1.49	15.44	0	2.77	0	0		Desecheo	Desecheo	2006	30
Des30	1.67	0	0	0	32.78	0	3.65	0	0		Desecheo	Desecheo	2006	30
Des30	4.86	15.49	0	0	6.53	0	0.97	0.2	0		Desecheo	Desecheo	2007	30
Des30	1.27	3.68	0	0	14.08	0	4.95	0	0		Desecheo	Desecheo	2007	30
Des30	2.18	0	0	0	12.91	0	0.87	0	0		Desecheo	Desecheo	2007	30
Des30	5.69	0.73	0	2.07	14.18	0	1.85	1.56	0		Desecheo	Desecheo	2007	30
Des30	3.99	0	0	0	32.26	0	3.76	0	0		Desecheo	Desecheo	2007	30
Des30	3.56	10.07	0	0	7.4	0	0.54	3.01	0		Desecheo	Desecheo	2008	30
Des30	3.87	2.22	0	0	13.05	0	2.94	0.5	0		Desecheo	Desecheo	2008	30
Des30	5.98	0	0	0	10.34	0	0.46	0	0		Desecheo	Desecheo	2008	30
Des30	5.7	0	0	1.9	13.6	0	1.37	0.32	0		Desecheo	Desecheo	2008	30
Des30	2.5	0	0	0	24	0	3.64	0	0		Desecheo	Desecheo	2008	30
Des30	4.55	8.26	0	0	5.59	0	2.02	0.55	0		Desecheo	Desecheo	2009	30
Des30	1.82	2.98	0	0	16.85	0	3.79	0	0		Desecheo	Desecheo	2009	30
Des30	4.89	0	0	0	17.64	0	0.52	0	0		Desecheo	Desecheo	2009	30
Des30	4.73	0	0	1.91	10.76	0	3.44	0	0		Desecheo	Desecheo	2009	30
Des30	1.94	0	0	0	25.27	0	1.44	0	0		Desecheo	Desecheo	2009	30
Des30	1.77	9.9	0	0	6.06	0	1.11	1.04	0		Desecheo	Desecheo	2010	30
Des30	4.62	2.56	0	0	15.46	0	3.59	0	0		Desecheo	Desecheo	2010	30
Des30	5.85	0	0	0	7.1	0	0.55	0	0		Desecheo	Desecheo	2010	30
Des30	3.21	0	0	1.5	13.26	0	3.85	0	0		Desecheo	Desecheo	2010	30
Des30	2.11	0	0	0	24.63	0	2.65	0	0		Desecheo	Desecheo	2010	30
Des30	5.06	7.9	0	0	7.12	0	2.15	1.93	0		Desecheo	Desecheo	2011	30
Des30	4.01	5.53	0	0	18.98	0	5.88	0	0		Desecheo	Desecheo	2011	30
Des30	5.23	0	0	0	11.28	0	2.06	0	0		Desecheo	Desecheo	2011	30
Des30	5.09	0	0	2.29	11.22	0	1.35	0	0		Desecheo	Desecheo	2011	30
Des30	4.31	0	0	0	17.25	0	3.81	0	0		Desecheo	Desecheo	2011	30
Des30	2.24566	7.99434	0	0	9.19811	0	3.31887	2.12264	0		Desecheo	Desecheo	2012	30
Des30	6.65939	3.27519	0	0	19.5415	0	5.24175	3.27519	0		Desecheo	Desecheo	2012	30
Des30	8.65979	0	0	0	9.17526	0	2.37113	0	0		Desecheo	Desecheo	2012	30
Des30	0.747651	0	0	0.747651	1.88586	0	4.26894	0	0		Desecheo	Desecheo	2012	30
Des30	2.29312	0	0	1.14656	29.1995	0	0	0	0		Desecheo	Desecheo	2012	30
Des30	5.13419	5.48425			5.71762		2.33372				Desecheo	Desecheo	2015	30
Des30	12.4312	0.660066			16.1716		3.52035				Desecheo	Desecheo	2015	30
Des30	9.88671				9.2688		2.16272				Desecheo	Desecheo	2015	30
Des30	2.88568			2.10877	16.8701	1.44284	3.77358	0.776915			Desecheo	Desecheo	2015	30
Des30	2.35546				30.621						Desecheo	Desecheo	2015	30
cb5	0	0	0	0	1.56	2.63	3.92	0	2.57		Palo	Cabo Rojo	2000	5
cb5	0	4.46	0	0	0.75	0	2.57	0	1.31		Palo	Cabo Rojo	2000	5
cb5	0	0	0	0	1.01	2.51	1.38	0	2.11		Palo	Cabo Rojo	2000	5
cb5	0	2.23	0	0	2.23	0.3	0.69	0	3.42		Palo	Cabo Rojo	2000	5
cb5	0	0	0	0	5.37	3.45	3.61	0.26	0		Palo	Cabo Rojo	2000	5
cb5	2.09713	0	0	0	10.596	0	1.98675	0	3.09051		Palo	Cabo Rojo	2012	5
cb5	0.77951	0	0	0	0.77951	0	3.56347	0	5.23385		Palo	Cabo Rojo	2012	5
cb5	0.508647	0	0	0	5.28993	0.712106	4.27263	1.52594	3.96745		Palo	Cabo Rojo	2012	5
cb5	0	0	0	0	19.7977	1.5896	0.433526	0	1.5896		Palo	Cabo Rojo	2012	5
cb5	0	0	0	0	2.67934	3.54365	1.64218	0.0864304	4.8401		Palo	Cabo Rojo	2012	5
cb5	2.31				4.40044				7.15072		Palo	Cabo Rojo	2015	5
cb5	0.83	1.97			1.03627				6.94301		Palo	Cabo Rojo	2015	5
cb5					7.35849		4.90566		3.20755		Palo	Cabo Rojo	2015	5
cb5					9.90783	1.04			1.95853		Palo	Cabo Rojo	2015	5
cb5					12.8423		0.75543	0.75543	2.92729		Palo	Cabo Rojo	2015	5
cb10	0	10.33	0	0	10.86	0.8	5.5	0	2.83		Resuellos	Cabo Rojo	2000	10
cb10	0	0	0	0	4.34	1.12	0.66	0	2.63		Resuellos	Cabo Rojo	2000	10
cb10	0	15.34	0	0	3.96	0.52	0.97	0	0.63		Resuellos	Cabo Rojo	2000	10
cb10	0.33	3.65	0	2.47	10.53	0.83	2.07	0	0		Resuellos	Cabo Rojo	2000	10
cb10	0	0	0	0	4.07	1.67	0	0	0.47		Resuellos	Cabo Rojo	2000	10
cb10	0	0	0	1.13142	8.35509	1.21845	0	0	1.47955		Resuellos	Cabo Rojo	2012	10
cb10	0	0	0	0	0.812183	0	2.13198	0	1.42132		Resuellos	Cabo Rojo	2012	10
cb10	0	0	0	0	8.08762	1.51643	0.252738	0	3.62258		Resuellos	Cabo Rojo	2012	10
cb10	0	0	0	2.90873	1.90572	1.10331	5.31595	0	6.82046		Resuellos	Cabo Rojo	2012	10
cb10	0	0	0	0	5.91182	0.801603	0.501002	0	2.50501		Resuellos	Cabo Rojo	2012	10
cb10		0.944287			15.0142	3.68272	0.566572		1.51086		Resuellos	Cabo Rojo	2015	10
cb10	0.85	8.52878		1.27932	3.94456		3.19829		5.75693		Resuellos	Cabo Rojo	2015	10
cb10		1.9861			4.66733	1.39027	2.58193		3.67428		Resuellos	Cabo Rojo	2015	10
cb10	0.63	5.36842			5.26316		2.42105		0.947368		Resuellos	Cabo Rojo	2015	10
cb10	0.35			2.1028	13.4346		3.73832		1.63551		Resuellos	Cabo Rojo	2015	10
cb10		1.86404			13.5965	8.22368	0.219298		2.52193		Resuellos	Cabo Rojo	2017	10
cb10	1.06075	8.00386			8.58245		3.76085		7.13597		Resuellos	Cabo Rojo	2017	10
cb10	0.686106				2.05832	1.37221	1.11492		4.80274		Resuellos	Cabo Rojo	2017	10
cb10		2.66798			5.5336		4.34783		0.889328		Resuellos	Cabo Rojo	2017	10
cb10		3.45489		2.4952	10.4607	1.15163	0.575816		5.18234		Resuellos	Cabo Rojo	2017	10
tourm10	4.43	6.37	0	0	11.37	0	5.24	6.82	0.8		Tourmaline	Mayaguez	2004	10
tourm10	3.88	0	41.07	0.46	18.11	0.8	4.69	1.25	0		Tourmaline	Mayaguez	2004	10
tourm10	2.37	10.77	0	1.79	19.34	1.43	10.86	3.31	0		Tourmaline	Mayaguez	2004	10
tourm10	9.8	0	0	1.14	14.27	1.14	2.27	5.84	0		Tourmaline	Mayaguez	2004	10
tourm10	5.35	0	0	0.76	10.94	1.55	3.18	8.07	0		Tourmaline	Mayaguez	2004	10
tourm10	1.86	1.56	0	1.7	13.44	0.73	3.32	14.99	0		Tourmaline	Mayaguez	2005	10
tourm10	2.61	0.21	38.1	0.96	18.82	0.52	4.64	1.77	0		Tourmaline	Mayaguez	2005	10
tourm10	3.5	8.77	0	0	17.07	2.06	6.92	4.66	0		Tourmaline	Mayaguez	2005	10
tourm10	5.44	0	0	2.16	8.58	0.98	1.88	4.67	0		Tourmaline	Mayaguez	2005	10
tourm10	4.5	0	0	0.41	11.47	1.52	3.77	4.93	0		Tourmaline	Mayaguez	2005	10
tourm10	1.15	2.72	1.56	0	7.72	0	2.75	14.85	0		Tourmaline	Mayaguez	2006	10
tourm10	1.07	0	33.54	0.39	16.22	0	5.28	2.52	0		Tourmaline	Mayaguez	2006	10
tourm10	1.53	7.9	0	2.05	6.99	1.54	10.77	0	0		Tourmaline	Mayaguez	2006	10
tourm10	4.55	0	0	0	4.3	0	3.53	0	0		Tourmaline	Mayaguez	2006	10
tourm10	0.89	0	0	0	5.26	2.66	1.84	0	0		Tourmaline	Mayaguez	2006	10
tourm10	1.04	2.08	0	1.04	7.82	0.93	4.35	17.63	0		Tourmaline	Mayaguez	2007	10
tourm10	0.65	0	43.4	0	9.59	0	4.52	2.38	0		Tourmaline	Mayaguez	2007	10
tourm10	2.4	8.18	0	2.1	10.51	1.88	8.87	7.85	0		Tourmaline	Mayaguez	2007	10
tourm10	7.14	0	0	0.98	2.56	0	3.12	6.86	0		Tourmaline	Mayaguez	2007	10
tourm10	3.58	0.2	0	0.9	0.6	2.75	6.85	6.85	2.59		Tourmaline	Mayaguez	2007	10
tourm10	1.74	0	0	0.49	3.54	0	2.57	0	0.88		Tourmaline	Mayaguez	2008	10
tourm10	0.32	0	41.05	1.12	15.81	0	4.04	0	0		Tourmaline	Mayaguez	2008	10
tourm10	2.04	8.05	0	1.68	10.49	1.56	5.03	0	0		Tourmaline	Mayaguez	2008	10
tourm10	1.09	0	0	0	4.79	2.39	6.1	0	0		Tourmaline	Mayaguez	2008	10
tourm10	3.74	0	0	0	2.92	1.28	7.63	0.3	0		Tourmaline	Mayaguez	2008	10
tourm10	0.32	0	0	1.83	7.4	0	6.03	20.31	0		Tourmaline	Mayaguez	2009	10
tourm10	0.83	0	52.96	0.73	11.39	0	2.37	0.52	0		Tourmaline	Mayaguez	2009	10
tourm10	4.23	7.56	0	1.03	7.07	1.37	12.28	12.52	0		Tourmaline	Mayaguez	2009	10
tourm10	7.96	0	0	1.15	3.35	0.31	2.9	7.51	0		Tourmaline	Mayaguez	2009	10
tourm10	5.03	0.94	0	0	3.65	2.08	1.71	5.65	0		Tourmaline	Mayaguez	2009	10
tourm10	3.3	0	0	0.62	2.86	0	5.57	14.22	0.93		Tourmaline	Mayaguez	2010	10
tourm10	0.31	0	55.28	0	13.33	0	4.59	0.73	0		Tourmaline	Mayaguez	2010	10
tourm10	5.05	7	0	1.62	10.56	1.4	7.42	7.19	0		Tourmaline	Mayaguez	2010	10
tourm10	9.73	0	0	0.99	3.85	1.38	1.47	2.45	0		Tourmaline	Mayaguez	2010	10
tourm10	6.35	0	0	0.83	5.39	0.96	3.76	1.99	0		Tourmaline	Mayaguez	2010	10
tourm10	7.04	0.87	0	1.08	8.46	0.33	5.92	4.46	0		Tourmaline	Mayaguez	2011	10
tourm10	7.26	0	0	0.75	7.11	1.12	2.53	0	0		Tourmaline	Mayaguez	2011	10
tourm10	3.8	7.36	0	2.93	11.48	1.9	8.79	5.23	0		Tourmaline	Mayaguez	2011	10
tourm10	0	0	52.47	1.31	13.29	0	2.32	2.4	0		Tourmaline	Mayaguez	2011	10
tourm10	2.81	0	0	1.04	5.4	0	5.62	21.89	0		Tourmaline	Mayaguez	2011	10
tourm10	5.01636	0	0	0	7.08833	0	8.9422	4.90731	0		Tourmaline	Mayaguez	2012	10
tourm10	0.3996	0	49.6503	0.999001	16.2837	0.799201	2.7972	0.599401	0		Tourmaline	Mayaguez	2012	10
tourm10	1.69671	4.66596	0	1.06045	11.0286	1.06045	7.52916	3.07529	0.212089		Tourmaline	Mayaguez	2012	10
tourm10	8.4223	0	0	0.830368	8.06643	0	7.23606	1.06762	0		Tourmaline	Mayaguez	2012	10
tourm10	6.3	0.9	0	1.2	8.9	0.5	6.3	2	0		Tourmaline	Mayaguez	2012	10
tourm10	4.32852				10.3219		3.21865	7.65816			Tourmaline	Mayaguez	2015	10
tourm10	0.526316		50.2105	2.21053	12		3.68421	1.78947			Tourmaline	Mayaguez	2015	10
tourm10	5	5.44444		1.77778	10.4444	1.22222	10.4444	2.66667	0.888889		Tourmaline	Mayaguez	2015	10
tourm10	8.43243		1.08108	1.08108	8.97297	1.08108	4.21622				Tourmaline	Mayaguez	2015	10
tourm10	6.93	1.68067		1.47059	11.5546	1.47059	4.51681				Tourmaline	Mayaguez	2015	10
tourm10	5.33024				6.60487		6.14137	6.95249			Tourmaline	Mayaguez	2017	10
tourm10	0.444939		61.0679	2.5584	7.00779	0.333704	1.44605	1.22358			Tourmaline	Mayaguez	2017	10
tourm10	7.277	5.28169			11.8545	1.40845	11.5023	2.58216	0.586854		Tourmaline	Mayaguez	2017	10
tourm10	11.5426			1.51025	9.38511	1.2945	2.37325	0.431499			Tourmaline	Mayaguez	2017	10
tourm10	5.61674			1.65198	7.15859	0.440529	8.03965	2.97357	0.440529		Tourmaline	Mayaguez	2017	10
tourm20	0	0	0	0	24.91	2.96	0.53	0	0.96		Tourmaline	Mayaguez	2004	20
tourm20	0	1.26	0	0	25.28	0.84	0.32	0	0		Tourmaline	Mayaguez	2004	20
tourm20	0	0	0	0	21.76	4.87	2.91	0	0.66		Tourmaline	Mayaguez	2004	20
tourm20	0	0	0	0.65	34.25	1.78	0.83	0	2.3		Tourmaline	Mayaguez	2004	20
tourm20	0	0.56	0	0	16.51	3.19	1.31	0	1.88		Tourmaline	Mayaguez	2004	20
tourm20	0.3	0	0	0	21.95	3.49	0.2	0	1.2		Tourmaline	Mayaguez	2005	20
tourm20	0	1.81	0	0	22.58	0.6	0.95	0	0		Tourmaline	Mayaguez	2005	20
tourm20	0	0	0	0	15.94	4.17	2.62	0	0.94		Tourmaline	Mayaguez	2005	20
tourm20	0	0	0	0.52	34.53	1.04	0.34	0	1.72		Tourmaline	Mayaguez	2005	20
tourm20	0.49	0.82	0	0	12.84	2.86	1.06	0	1.55		Tourmaline	Mayaguez	2005	20
tourm20	0	0	0	0	17.33	10.64	0	0	1.18		Tourmaline	Mayaguez	2006	20
tourm20	0	1.12	0	0	24.22	0.69	0	0	0		Tourmaline	Mayaguez	2006	20
tourm20	0	0	0	0	14.75	12.95	0	0	0		Tourmaline	Mayaguez	2006	20
tourm20	0	0	0	0.69	26.33	1.23	0	0	0		Tourmaline	Mayaguez	2006	20
tourm20	0	0.51	0	0	12.59	3.12	0	0	0		Tourmaline	Mayaguez	2006	20
tourm20	0	0	0	0.52	19.4	3.61	0	0	1.47		Tourmaline	Mayaguez	2007	20
tourm20	0	1.4	0	0	16.92	0	1.43	0	0		Tourmaline	Mayaguez	2007	20
tourm20	0	0	0	0	10.32	4.89	2.38	0	0.86		Tourmaline	Mayaguez	2007	20
tourm20	0	0	0	0.67	18.84	1.01	0.67	0	1.67		Tourmaline	Mayaguez	2007	20
tourm20	0.55	0.46	0	0	15.35	3.19	1.46	0	2.19		Tourmaline	Mayaguez	2007	20
tourm20	0	0	0	0.76	19.64	3.56	0	0	1.08		Tourmaline	Mayaguez	2008	20
tourm20	0	2.17	0	0	13.75	0	0.78	0	0		Tourmaline	Mayaguez	2008	20
tourm20	0	0	0	0	10.33	5.48	0	0	1.07		Tourmaline	Mayaguez	2008	20
tourm20	0	0	0	0.59	24.46	2.1	0.51	0	1.6		Tourmaline	Mayaguez	2008	20
tourm20	0.86	0	0	0	12.69	3.54	1.34	0	2.1		Tourmaline	Mayaguez	2008	20
tourm20	0.69	0	0	0	21.53	1.04	0	0	1.5		Tourmaline	Mayaguez	2009	20
tourm20	0	2.76	0	1.58	17.84	0	1.89	0	0		Tourmaline	Mayaguez	2009	20
tourm20	0	0	0	0	13.69	7.17	1.84	0	3.16		Tourmaline	Mayaguez	2009	20
tourm20	0	0	0	0.6	22.62	0.61	0	0	1.62		Tourmaline	Mayaguez	2009	20
tourm20	0.28	0	0	0.57	14.36	3.51	1.52	0	2.47		Tourmaline	Mayaguez	2009	20
tourm20	0.46	0	2.31	0.55	22.13	2.23	0	0	1.48		Tourmaline	Mayaguez	2010	20
tourm20	0	2.68	0	0	17.36	0	1.43	0	0		Tourmaline	Mayaguez	2010	20
tourm20	0.92	0	0	0	10.91	3.22	2.76	0.28	0		Tourmaline	Mayaguez	2010	20
tourm20	0	0	0	0.52	20.8	0.26	0.78	0	0		Tourmaline	Mayaguez	2010	20
tourm20	0	0	0	0	13.4	3.5	2.07	0	2.04		Tourmaline	Mayaguez	2010	20
tourm20	0.83	0	1.25	0	21.63	2.22	0	0	2.3		Tourmaline	Mayaguez	2011	20
tourm20	0	2.94	0	1.61	18.68	0	1.62	0	0		Tourmaline	Mayaguez	2011	20
tourm20	0.5	0	0	0	15.63	7.39	1.92	0	0		Tourmaline	Mayaguez	2011	20
tourm20	0	0	0	0.61	22.23	0	0.87	0	1.4		Tourmaline	Mayaguez	2011	20
tourm20	0	0	0	0	16.07	3.71	1.64	0	1.74		Tourmaline	Mayaguez	2011	20
tourm20	1.29225	0	0	0	23.9563	5.4672	0.0994036	0	1.88867		Tourmaline	Mayaguez	2012	20
tourm20	0.20202	3.13131	0	0	17.4747	0	2.0202	0.4	0		Tourmaline	Mayaguez	2012	20
tourm20	1.15274	0	0	0	11.2392	0.384246	0.288184	0	3.26609		Tourmaline	Mayaguez	2012	20
tourm20	0	0	0	0.373448	20	0	0.93362	0	2.61414		Tourmaline	Mayaguez	2012	20
tourm20	3.2567	0	0	0	17.3372	3.9272	1.53257	0	2.01149		Tourmaline	Mayaguez	2012	20
tourm20	0.83				25.0261	1.45985			0.625652		Tourmaline	Mayaguez	2015	20
tourm20	2.64	3.17		0.422833	19.0275		3.06554				Tourmaline	Mayaguez	2015	20
tourm20					15.4832	1.87377			2.95858		Tourmaline	Mayaguez	2015	20
tourm20					26.0086		0.944206		1.88841		Tourmaline	Mayaguez	2015	20
tourm20	3.29			1.87793	16.9953	3.09859	2.44131		1.87793		Tourmaline	Mayaguez	2015	20
tourm20	1.38067				25.5424	2.16963			0.690335		Tourmaline	Mayaguez	2017	20
tourm20	0.510725	3.47293			22.6762		2.14505				Tourmaline	Mayaguez	2017	20
tourm20					17.2973	3.35135			2.16216		Tourmaline	Mayaguez	2017	20
tourm20					27.2201		3.0888		2.3166		Tourmaline	Mayaguez	2017	20
tourm20					26.1453	2.4581	3.79888		1.22905		Tourmaline	Mayaguez	2017	20
tourm30	4.5	0	0	0	5.28	0	1.34	0	0		Tourmaline	Mayaguez	2004	30
tourm30	7.45	0	0	0	8.93	0.77	0	0	0		Tourmaline	Mayaguez	2004	30
tourm30	0	0	0	0	4.03	3.37	0	0	0		Tourmaline	Mayaguez	2004	30
tourm30	3.37	0	0	0	1.22	0.61	0	0	0		Tourmaline	Mayaguez	2004	30
tourm30	5.12	0	0	0	6.54	3.64	0	0.66	0		Tourmaline	Mayaguez	2004	30
tourm30	6.31	0	0	0	5.11	0	0	0	0		Tourmaline	Mayaguez	2005	30
tourm30	9.39	0	0	0	9.86	0.86	0	0	0		Tourmaline	Mayaguez	2005	30
tourm30	1.88	0	0	0	3.59	3.35	0	0	0		Tourmaline	Mayaguez	2005	30
tourm30	2.17	0	0	0	2.18	1.05	0	0	0		Tourmaline	Mayaguez	2005	30
tourm30	5.81	0	0	0.68	8.8	3.71	0	0	0.48		Tourmaline	Mayaguez	2005	30
tourm30	4.06	0	0	0	5.95	0	2.17	0	0		Tourmaline	Mayaguez	2006	30
tourm30	9.69	0	0	0	6.14	1.08	0	0	0		Tourmaline	Mayaguez	2006	30
tourm30	4.1	0	0	0	3.7	3.25	0	0	0		Tourmaline	Mayaguez	2006	30
tourm30	4.69	0	0	0	3.14	0	0	0	0.36		Tourmaline	Mayaguez	2006	30
tourm30	5.97	0	0	0	8.93	3.26	0	0	0.75		Tourmaline	Mayaguez	2006	30
tourm30	6.68	0	0	0	4.61	0	0.89	0	0		Tourmaline	Mayaguez	2007	30
tourm30	7.56	0	0	0	8.63	0	0	0	0		Tourmaline	Mayaguez	2007	30
tourm30	1.37	0	0	0	2.57	2.57	0	0	0		Tourmaline	Mayaguez	2007	30
tourm30	4.47	0	0	0	2.5	0	0	0	1.32		Tourmaline	Mayaguez	2007	30
tourm30	7.47	0	0	0	6.28	2.75	0.39	0	0		Tourmaline	Mayaguez	2007	30
tourm30	2.85	0	0	0	3.84	0	2.85	0	0		Tourmaline	Mayaguez	2008	30
tourm30	10.83	0	0	0	7.52	1.14	0	0	0		Tourmaline	Mayaguez	2008	30
tourm30	1.49	0	0	0	4.36	2.43	0	0	0.44		Tourmaline	Mayaguez	2008	30
tourm30	2.18	0	0	0	4.82	0	0.47	0	0		Tourmaline	Mayaguez	2008	30
tourm30	8.6	0	0	0	7.86	1.99	0	0	0		Tourmaline	Mayaguez	2008	30
tourm30	4.76	0	0	0	5.21	0.36	1.52	0	0		Tourmaline	Mayaguez	2009	30
tourm30	7.77	0	0	0	6.12	0	0	0	0		Tourmaline	Mayaguez	2009	30
tourm30	2.52	0	0	0	4.74	2.64	0	0	0		Tourmaline	Mayaguez	2009	30
tourm30	5.4	0	0	0	6.51	0	0.31	0	0.47		Tourmaline	Mayaguez	2009	30
tourm30	9.36	0	0	0	7.33	1.82	0	0	0.76		Tourmaline	Mayaguez	2009	30
tourm30	4.61	0	0	0	4.73	0	0	0	0		Tourmaline	Mayaguez	2010	30
tourm30	4.57	0	0	0	6.25	0	0.87	0	0		Tourmaline	Mayaguez	2010	30
tourm30	1.08	0	0	0	7.43	0	0.43	0	0.6		Tourmaline	Mayaguez	2010	30
tourm30	5.36	0	0	0	3.91	0	0	0	0		Tourmaline	Mayaguez	2010	30
tourm30	3.52475	0	0	0	10.89	2.61	1.22	0	0.85		Tourmaline	Mayaguez	2010	30
tourm30	6.3	0	0	0	5.39	1.39	2.06	0	1.36		Tourmaline	Mayaguez	2011	30
tourm30	10.26	0	0	0	6	0.39	0.39	0	0		Tourmaline	Mayaguez	2011	30
tourm30	3	0	0	0	8.69	2.13	0	0	0		Tourmaline	Mayaguez	2011	30
tourm30	4.89	0	0	0	7.01	0	0.4	0	0		Tourmaline	Mayaguez	2011	30
tourm30	10.7	0	0	0	10.62	3.52	0	0	0		Tourmaline	Mayaguez	2011	30
tourm30	10.583	0	0	0	5.65022	0.896861	1.16592	0	0		Tourmaline	Mayaguez	2012	30
tourm30	15.3404	0	0	0	6.42378	1.05465	0	0	0.383509		Tourmaline	Mayaguez	2012	30
tourm30	3.25581	0	0	0	4.37209	1.02326	0	0	0		Tourmaline	Mayaguez	2012	30
tourm30	8.4	0	0	0	8.5	2.1	2	0	0		Tourmaline	Mayaguez	2012	30
tourm30	3	0	0	0	8.3	0	0	0	0		Tourmaline	Mayaguez	2012	30
tourm30	17.898				3.12175		2.60146		1.66493		Tourmaline	Mayaguez	2015	30
tourm30	12.0308				8.18094		1.15496				Tourmaline	Mayaguez	2015	30
tourm30	9.80019				7.6118	0.76118			0.666032		Tourmaline	Mayaguez	2015	30
tourm30	11.2349				8.72795				0.928505		Tourmaline	Mayaguez	2015	30
tourm30	6.71712			0.567644	5.58184	3.12204	0.756859		0.189215		Tourmaline	Mayaguez	2015	30
tourm30	13.5417				3.125		1.66667		0.416667		Tourmaline	Mayaguez	2017	30
tourm30	12.8703				7.45659		1.02145				Tourmaline	Mayaguez	2017	30
tourm30	8.0855				4.73978	0.836431	4.64684		0.929368		Tourmaline	Mayaguez	2017	30
tourm30	11.8952				7.15726				1.10887		Tourmaline	Mayaguez	2017	30
tourm30	8.19849				13.5922	3.55987	0.755124		1.61812		Tourmaline	Mayaguez	2017	30
tres10	0	0	0	0	8.27	2.58	0.36	0	0		Tres Palmas	Rincon	2004	10
tres10	0.74	0	0	0	4.77	8.44	2.45	0	0		Tres Palmas	Rincon	2004	10
tres10	1.47	2.82	0	0.86	0	10.04	3.3	0	2.57		Tres Palmas	Rincon	2004	10
tres10	1.33	7.59	0	1.5	0	5.84	1.15	0.38	0		Tres Palmas	Rincon	2004	10
tres10	0.97	0	0	0	0	6.04	2.02	0.88	2.1		Tres Palmas	Rincon	2004	10
tres10	0.34	0	0	0	6.57	2.56	0.23	0	0		Tres Palmas	Rincon	2005	10
tres10	1.35	0	0	2.04	3.02	3.75	2.28	0	0.23		Tres Palmas	Rincon	2005	10
tres10	2	1.66	0	1.05	0	9.48	3.24	0	1.75		Tres Palmas	Rincon	2005	10
tres10	0	6.55	0	0	0	4.31	1.78	0	2.96		Tres Palmas	Rincon	2005	10
tres10	0.48	0	0	0	0	3.8	7.93	0.24	2.7		Tres Palmas	Rincon	2005	10
tres10	0	0	0	0	3.79	2.77	0.71	0	0		Tres Palmas	Rincon	2006	10
tres10	1.37	0	0	1.37	3.62	5.79	3.54	0	0		Tres Palmas	Rincon	2006	10
tres10	0.81	2.33	0	0.93	0	10.49	1.49	0	0		Tres Palmas	Rincon	2006	10
tres10	0.82	6.76	0	0	0	5.79	1.99	0	1.75		Tres Palmas	Rincon	2006	10
tres10	0	0	0	0	0	3.04	6.98	0.35	2.2		Tres Palmas	Rincon	2006	10
tres10	0	0	0	0	4.94	2.29	1.37	0	0		Tres Palmas	Rincon	2007	10
tres10	0.71	0	0	1.52	2.95	6.4	3.45	0	0.71		Tres Palmas	Rincon	2007	10
tres10	0.69	0.46	0	0.93	0	10.52	1.89	0	0.46		Tres Palmas	Rincon	2007	10
tres10	0.97	6.64	0	0	0	4.37	2.32	0	2.4		Tres Palmas	Rincon	2007	10
tres10	0	0	0	0	0	2.34	4.1	0.35	2.24		Tres Palmas	Rincon	2007	10
tres10	0.48	0	0	1.43	4.32	2.12	0.6	0	0		Tres Palmas	Rincon	2008	10
tres10	1.26	0	0	1.1	2.02	5.56	5.9	0	0.83		Tres Palmas	Rincon	2008	10
tres10	1.03	2.4	0	0.69	0	10.64	5.61	0	0		Tres Palmas	Rincon	2008	10
tres10	2.06	8.66	0	0	0	2.57	3	0	0		Tres Palmas	Rincon	2008	10
tres10	0.36	0	0	0	0	2.71	8.81	0.48	1.91		Tres Palmas	Rincon	2008	10
tres10	0.36	2.13	0	0	4.12	2.35	1.68	0	0		Tres Palmas	Rincon	2009	10
tres10	2.85	0	0	0.92	1.83	3.91	2.28	0	0.69		Tres Palmas	Rincon	2009	10
tres10	1.5	2.34	0	0.94	0	11.72	3.99	0	0		Tres Palmas	Rincon	2009	10
tres10	1.4	7.52	0	0	0.46	5.75	3.78	0	2.79		Tres Palmas	Rincon	2009	10
tres10	0.59	0	0	0	0	3.2	7.32	0	2.01		Tres Palmas	Rincon	2009	10
tres10	0.92	0	0	0	4.34	2.34	0.35	0	0		Tres Palmas	Rincon	2010	10
tres10	1.08	0	0	0.7	4.83	5.42	2.83	0	0.82		Tres Palmas	Rincon	2010	10
tres10	0.49	0.37	0	1.34	0	9.26	3.9	0	0		Tres Palmas	Rincon	2010	10
tres10	1.21	8.2	0	0	0	4.37	2.18	0	1.94		Tres Palmas	Rincon	2010	10
tres10	0.48	0	0	0	0	6.5	2.74	0	2.29		Tres Palmas	Rincon	2010	10
tres10	0.48	0	0	0	3.82	2.12	0	0	0		Tres Palmas	Rincon	2011	10
tres10	3.04	0.46	0	0	2.2	8.22	3.7	0	1.04		Tres Palmas	Rincon	2011	10
tres10	2.78	0	0	0.92	0	7.12	3.19	0	1.39		Tres Palmas	Rincon	2011	10
tres10	1.23	9.3	0	0	0.62	6.16	2.38	0	1.98		Tres Palmas	Rincon	2011	10
tres10	0	0	0	0	0	18.23	5.27	0	2.14		Tres Palmas	Rincon	2011	10
tres10	0.616523	0	0	0	2.7127	1.60296	2.21948	0	0		Tres Palmas	Rincon	2012	10
tres10	4.15778	0	0	0	0.639659	3.51812	4.90405	0	0.852878		Tres Palmas	Rincon	2012	10
tres10	0	0.826446	0	0	0	8.26446	2.24321	0	2.47934		Tres Palmas	Rincon	2012	10
tres10	0	5.54156	0	0	0.755668	5.03778	1.63728	0	1.51134		Tres Palmas	Rincon	2012	10
tres10	0	0	0	0	0	8.84265	6.63199	0	3.25098		Tres Palmas	Rincon	2012	10
tres10	3.86417					7.25995	5.03513		1.17096		Tres Palmas	Rincon	2015	10
tres10	2.84698				1.9	5.33808	8.18505		0.711744		Tres Palmas	Rincon	2015	10
tres10	1.30332					5.92417	2.60664		2.72512		Tres Palmas	Rincon	2015	10
tres10	1.92771	9.64				3.13253	7.3494		3.25301		Tres Palmas	Rincon	2015	10
tres10	0.12837					3.59435	5.77664		2.18228		Tres Palmas	Rincon	2015	10
tres10	2.23529				5.29412	4.35294	3.76471				Tres Palmas	Rincon	2017	10
tres10	3.4292				1.99115	3.76106	5.97345		0.774336		Tres Palmas	Rincon	2017	10
tres10	1.07143					7.38095	5.95238		2.85714		Tres Palmas	Rincon	2017	10
tres10	0.252845	11.378				3.91909	6.19469		1.39064		Tres Palmas	Rincon	2017	10
tres10	1.02433					8.57875	6.27401		1.53649		Tres Palmas	Rincon	2017	10
tres20	0.48	6.2	0	0.95	1.91	2.51	1.07	1.31	0		Tres Palmas	Rincon	2004	20
tres20	1.16	1.37	0	1.37	6.41	3.26	2.83	3.68	0		Tres Palmas	Rincon	2004	20
tres20	0	0.57	0	2.83	19.17	2.05	0	0	0		Tres Palmas	Rincon	2004	20
tres20	0.34	2	0	4.53	3.73	1.68	2.97	0	0		Tres Palmas	Rincon	2004	20
tres20	1.8	0	0	1.4	9.19	2.11	3.04	0.33	0		Tres Palmas	Rincon	2004	20
tres20	2.53	0	0	1.14	1.62	3	0.57	0	0		Tres Palmas	Rincon	2005	20
tres20	1.4	5.04	0	0.65	5.04	3.36	2.9	0	0		Tres Palmas	Rincon	2005	20
tres20	0.6	2.31	0	2	14.06	1.41	0.8	0	0		Tres Palmas	Rincon	2005	20
tres20	1.97	0	0	2.68	5.78	1.42	2.35	0	0		Tres Palmas	Rincon	2005	20
tres20	0.45	1.56	0	2.69	16.03	1.58	1.58	0	1.9		Tres Palmas	Rincon	2005	20
tres20	2.43	0	0	0	1.59	2.43	0.23	0	0		Tres Palmas	Rincon	2006	20
tres20	0.1	0.68	0	0.39	0.9	0.46	0.28	0	0		Tres Palmas	Rincon	2006	20
tres20	0	3.47	0	3.01	15.97	1.63	0	0	0		Tres Palmas	Rincon	2006	20
tres20	1.55	0	0	3.83	4.92	1.41	4.83	0	0		Tres Palmas	Rincon	2006	20
tres20	2.07	1.82	0	0.85	6.55	0.61	1.21	0	0		Tres Palmas	Rincon	2006	20
tres20	1.83	0	0	0.97	1.72	2.28	0	0	0		Tres Palmas	Rincon	2007	20
tres20	1.84	3.98	0	2.06	4.79	3.1	1.55	0	0		Tres Palmas	Rincon	2007	20
tres20	0.33	3.41	0	3.26	17.6	1.75	0	0	0		Tres Palmas	Rincon	2007	20
tres20	1.36	0	0	4.25	3.94	1.17	1.59	0	0		Tres Palmas	Rincon	2007	20
tres20	0	1.63	0	1.85	10.63	0.65	1.54	0	1.95		Tres Palmas	Rincon	2007	20
tres20	2.8	0	0	0.35	1.51	3.71	0	0	0		Tres Palmas	Rincon	2008	20
tres20	0.94	3.42	0	0.73	7.13	3.27	1.56	0	1.88		Tres Palmas	Rincon	2008	20
tres20	0	2.31	0	2.66	16.41	1.21	0	0	0		Tres Palmas	Rincon	2008	20
tres20	2.06	0	0	1.85	7.31	1.39	4.27	0	0		Tres Palmas	Rincon	2008	20
tres20	0.67	0	0	8.2	7.01	1	1.65	0	0		Tres Palmas	Rincon	2008	20
tres20	4.49	0	0	1.61	1.95	3.02	0	0	0		Tres Palmas	Rincon	2009	20
tres20	0	4.54	0	0.99	7.9	3.52	1.33	0	0		Tres Palmas	Rincon	2009	20
tres20	0	1.6	0	5.94	19.45	1.83	0	0	0		Tres Palmas	Rincon	2009	20
tres20	3.16	0	0	3.11	9.64	1.46	4.94	0	0		Tres Palmas	Rincon	2009	20
tres20	1.39	0	0	4.17	11.27	0	1.15	0	0		Tres Palmas	Rincon	2009	20
tres20	8.46	0	0	1.45	2.53	4.03	0	0	0.33		Tres Palmas	Rincon	2010	20
tres20	2.51	0	0	2.67	9.19	3.09	5.26	0	5.26		Tres Palmas	Rincon	2010	20
tres20	0	1.65	0	3.44	19.92	1.98	0	0	0		Tres Palmas	Rincon	2010	20
tres20	2.96	0	0	2.7	7.85	1.19	2.28	0	1.55		Tres Palmas	Rincon	2010	20
tres20	1.91	1.64	0	2.66	11.95	0	1.91	0	0		Tres Palmas	Rincon	2010	20
tres20	5.82	0	0	1.12	1.99	1.57	0	0	1.8		Tres Palmas	Rincon	2011	20
tres20	2.33	4.06	0	1.8	8.64	2.03	4.3	0	4.43		Tres Palmas	Rincon	2011	20
tres20	0.34	0	0	4.38	20.53	2.24	0	0	0		Tres Palmas	Rincon	2011	20
tres20	3.98	0	0	1.83	7.49	1.38	4.48	0	0		Tres Palmas	Rincon	2011	20
tres20	1.82	1.71	0	0.46	11.17	0	2.43	0	0.68		Tres Palmas	Rincon	2011	20
tres20	0.237248	5.69395	0	1.30486	5.81257	0.237248	1.89798	0	0.948992		Tres Palmas	Rincon	2012	20
tres20	5.67227	0	0	0	1.68067	1.57563	0	0	0.420168		Tres Palmas	Rincon	2012	20
tres20	0.334076	0.556793	0	6.90423	20.8241	0	0.334076	0	0		Tres Palmas	Rincon	2012	20
tres20	3.84168	0	0	0.931315	9.6624	2.79395	5.12224	0	0		Tres Palmas	Rincon	2012	20
tres20	2.67559	1.44928	0	2.78707	11.3712	0	3.233	0	0.668896		Tres Palmas	Rincon	2012	20
tres20	4.72895	0.81		3.11419	11.0727		2.99885				Tres Palmas	Rincon	2015	20
tres20	4.14747			2.07373	10.1382	1.72811	3.1106				Tres Palmas	Rincon	2015	20
tres20	0.77			5.69551	18.6199	0.219058					Tres Palmas	Rincon	2015	20
tres20	2.30024			2.42131	7.02179	2.7845	3.63196		4.48		Tres Palmas	Rincon	2015	20
tres20	7.89149				1.35635	4.43896			0.99		Tres Palmas	Rincon	2015	20
tres20	5.46968			1.07015	4.28062	0.713436	0.951249		2.25922		Tres Palmas	Rincon	2017	20
tres20	0	3.22581		2.47312	13.6559	1.72043	2.25806		1.1828		Tres Palmas	Rincon	2017	20
tres20	1.01237			4.61192	24.7469						Tres Palmas	Rincon	2017	20
tres20	4.6798			1.60099	11.33	1.23153	4.31034				Tres Palmas	Rincon	2017	20
tres20	3.90995	1.54028		1.77725	12.4408		4.9763		0.829384		Tres Palmas	Rincon	2017	20
mona10	1.9				24.93		0.32		0.84		Mona	Mona	2000	10
mona10	1.11			0.4	5.22	1.5	1.22		1.21		Mona	Mona	2000	10
mona10	2.04										Mona	Mona	2000	10
mona10	1.7				10.95	2.95					Mona	Mona	2000	10
mona10	0				3.7	4.22	2.42		1.81		Mona	Mona	2000	10
mona10	1.81						1.85				Mona	Mona	2008	10
mona10	2.37				12.12	3.59	2.42				Mona	Mona	2008	10
mona10	1.86					2.33	3.42				Mona	Mona	2008	10
mona10	1.2	0.56			1.01	1.91	3.68		1.6		Mona	Mona	2008	10
mona10	0.26						4.78				Mona	Mona	2008	10
mona10	1.67						1.87				Mona	Mona	2009	10
mona10	0.49				15.04	0.86	2.84				Mona	Mona	2009	10
mona10	3.16	2.71			1.74	1.09	1.54				Mona	Mona	2009	10
mona10	0.86				2.16	1.3	6.51		0.86		Mona	Mona	2009	10
mona10	0.98			2.32			4.68				Mona	Mona	2009	10
mona10	2.1						2.9				Mona	Mona	2010	10
mona10	0.7				11.3	1.4	1.6				Mona	Mona	2010	10
mona10	1.6	2.1			2.7		1.8				Mona	Mona	2010	10
mona10	1.2					1.2	8.1		1		Mona	Mona	2010	10
mona10							2.3				Mona	Mona	2010	10
mona20	1.78				24.29		2.76				Mona	Mona	2000	20
mona20	4.57	1.39		0.4	13.04		2.47	3.38			Mona	Mona	2000	20
mona20	4.35			0.99	18.86		1.05				Mona	Mona	2000	20
mona20	2.49	11.37			24.96		3.97				Mona	Mona	2000	20
mona20	1.81	15.22			26.27		1.06		1.81		Mona	Mona	2000	20
mona20	1.94			1.32	2.41	1.53	2.33		1.42		Mona	Mona	2008	20
mona20		1.55			4.18		1.06				Mona	Mona	2008	20
mona20	4.48				4.7		1.08		2.24		Mona	Mona	2008	20
mona20					1.17		2.66				Mona	Mona	2008	20
mona20	0.44	12.28					0.65		0.44		Mona	Mona	2008	20
mona20		6.22		1	1.11	3.22	4.33				Mona	Mona	2009	20
mona20	1.25			1.17			1.67	0.35	0.94		Mona	Mona	2009	20
mona20	1.75				4.24		3.58	0.31	2.06		Mona	Mona	2009	20
mona20	2.96	3.38		0.34			2				Mona	Mona	2009	20
mona20	1.16	10.94					2.72		1.4		Mona	Mona	2009	20
mona20	1.6				2.6		2.2		3.1		Mona	Mona	2010	20
mona20	1.3	3.4			3.7		1.4	1.5			Mona	Mona	2010	20
mona20	5.8				0.9		2		1.7		Mona	Mona	2010	20
mona20	0.5						2.4				Mona	Mona	2010	20
mona20	0.4	11.5					1.4		3.4		Mona	Mona	2010	20
Canjilones	0.52				13.09	4.08		1.71	4.31		Canjilones	Vieques	2001	20
Canjilones	1.04				21.79	3.62					Canjilones	Vieques	2001	20
Canjilones	2.64			0.87	16.83		1.19	1.35			Canjilones	Vieques	2001	20
Canjilones	5.6				12.42	3.52					Canjilones	Vieques	2001	20
Canjilones	0				21.96	0.52	1.22		0.8		Canjilones	Vieques	2001	20
Canjilones	2.04				10.21	2.79	0.65	0.19	3.8		Canjilones	Vieques	2004	20
Canjilones	0				25.34	0.64		1.45			Canjilones	Vieques	2004	20
Canjilones	1.82				13.83		1.36				Canjilones	Vieques	2004	20
Canjilones	4.52				11.49	2.55	1.97		0.98		Canjilones	Vieques	2004	20
Canjilones	0.28				28.53	0.76	1.13				Canjilones	Vieques	2004	20
Canjilones	0				5.11296		1.66468	0.237812	4.51843		Canjilones	Vieques	2012	20
Canjilones	0.621118				0.621118	1.0352	2.58799		0.517598		Canjilones	Vieques	2012	20
Canjilones	0				5.84291		1.81992		0.287356		Canjilones	Vieques	2012	20
Canjilones	0.616523				0.493218			0.123305	1.10974		Canjilones	Vieques	2012	20
Canjilones	0				11.9021			0.889878	1.11235		Canjilones	Vieques	2012	20
Canjilones	0.587659				15.9647	1.07738	0.685602				Canjilones	Vieques	2016	20
Canjilones	0.392927				5.79568	0.785855	2.94695		1.96464		Canjilones	Vieques	2016	20
Canjilones	1.84109				9.59302	0.290698	2.03488	0.387597			Canjilones	Vieques	2016	20
Canjilones	0.367647	1.28676			8.27206	0.367647	0.919118	0.275735	3.21691		Canjilones	Vieques	2016	20
Canjilones	0.492126				5.90551	3.93701	3.44488	0.492126	0.295276		Canjilones	Vieques	2016	20
Esperanza	0.736289				31.82	3.12	0.63				Esperanza	Vieques	2001	10
Esperanza	0				26.39	1.21	2		0.4		Esperanza	Vieques	2001	10
Esperanza	0.29				45.48	0.98			2.42		Esperanza	Vieques	2001	10
Esperanza	0				33.6		1.47	0.44			Esperanza	Vieques	2001	10
Esperanza	0.87				6.58		1.91	2.38	3.34		Esperanza	Vieques	2001	10
Esperanza	0				6.86		2.89	1.18	2.14		Esperanza	Vieques	2004	10
Esperanza	0.32				34.87		0.84				Esperanza	Vieques	2004	10
Esperanza	0.29				43.15	0.88					Esperanza	Vieques	2004	10
Esperanza	0.43				30.42		2.45	1.17	1.7		Esperanza	Vieques	2004	10
Esperanza	0				26.24	4.26			2.18		Esperanza	Vieques	2004	10
Esperanza	0.926999				12.7462		3.47625				Esperanza	Vieques	2012	10
Esperanza	1.2848				6.20985	1.606	2.78373	0.535332			Esperanza	Vieques	2012	10
Esperanza	1.2				15.2381		1.07143	2.85714			Esperanza	Vieques	2012	10
Esperanza	0				9.92991	3.73832					Esperanza	Vieques	2012	10
Esperanza	0				7.97546	0.613497	1.10429		6.25767		Esperanza	Vieques	2012	10
Esperanza	0				2.71547		2.71547		2.00708		Esperanza	Vieques	2016	10
Esperanza	0				2.65907		0.759734				Esperanza	Vieques	2016	10
Esperanza	0.875486				3.01556	0.875486	0.875486				Esperanza	Vieques	2016	10
Esperanza	0.607287				6.37652		0.910931		6.17409		Esperanza	Vieques	2016	10
Esperanza	0				17.0558		0.71066		3.45178		Esperanza	Vieques	2016	10
